# Supplementary material for: Risk of malignant disease in 1-year sepsis survivors, a registry-based nationwide follow-up study
Source: Springer Nature journal article supplement (doi:10.1186/s13054-023-04654-9), 2023-09-29
Supplement: MOESM1 [file 26105660]

# Additional material

## INDEX

|                                                                                                                                                                       |    |
|-----------------------------------------------------------------------------------------------------------------------------------------------------------------------|----|
| <b>TABLE E 1.</b> Benign tumors that are reported to Cancer registry                                                                                                  | 2  |
| <b>TABLE E 2.</b> Cancer types according to ICD–codes                                                                                                                 | 3  |
| <b>TABLE E 3.</b> Standardized incidence ratio of new cancer in men and women according to severity of acute disease.                                                 | 4  |
| <b>TABLE E 4.</b> Site–specific a) standardized incidence ratios (SIR) and<br>b) crude and adjusted incidence rates (IR) of cancer per 100 000 person years for men   | 5  |
| <b>TABLE E 5.</b> Site–specific a) standardized incidence ratios (SIR) and<br>b) crude and adjusted incidence rates (IR) of cancer per 100 000 person years for women | 7  |
| <b>TABLE E 6.</b> Site–specific standardized incidence ratios (SIR) of cancer<br>by length of follow up for men                                                       | 9  |
| <b>TABLE E 7.</b> Site–specific standardized incidence ratios (SIR) of cancer<br>by length of follow up for women                                                     | 11 |

**TABLE E 1. Benign tumors that are reported to Cancer registry.**

|                                    |                                                                                                                                        |
|------------------------------------|----------------------------------------------------------------------------------------------------------------------------------------|
| Thymus                             | Thymoma                                                                                                                                |
| Endocrine glands                   | All diagnoses except thyroid adenoma and adenoma of the adrenal cortex with no endocrine activity                                      |
| Placenta                           | Complete or partial mola hydatidosa and trophoblast tumors originating in placenta                                                     |
| Nasal cavity                       | Schneider tumor                                                                                                                        |
| Intracranial or intraspinal        | All diagnoses                                                                                                                          |
| Testicles                          | Teratomas, Leydig and Sertoli cell tumors, Sertoli–Leydig cell tumors                                                                  |
| Urinary bladder and urinary system | Urothelial papilloma except inverted papilloma and papilloma without atypia                                                            |
| Ovary                              | Borderline tumors, theca cell tumors, granuloma–theca cell tumors, luteoma, Leydig and Sertoli cell tumors, Sertoli–Leydig cell tumors |
| Orbit                              | Optic nerve meningeoma                                                                                                                 |
| Nasopharynx                        | Juvenile angiofibroma                                                                                                                  |

TABLE E 2. Cancer types according to ICD–codes

| Cancer types                                                                         |
|--------------------------------------------------------------------------------------|
| Hemato.lymph="^C8[1–6] ^C88 ^C9[0–6] ^D45 ^D46 ^D47[0–1] ^D47[3–9]",                 |
| Colorectal.cancer="^C18 ^C19 ^C20 ^C21",                                             |
| Lung.cancer="^C33 ^C34",                                                             |
| Skin.nonmelanoma="^C44 ^C460",                                                       |
| Prostate.cancer="^C61",                                                              |
| Pancreatic.cancer="^C25 ^157",                                                       |
| Bladder.cancer="^C6[5–8] ^D09[0–1] ^D30[1–9] ^D41[1–9]",                             |
| Liver.cancer="^C22",                                                                 |
| Gallbladder.cancer="^C2[3–4]",                                                       |
| Stomach="^C16",                                                                      |
| Kidney.cancer="^C64",                                                                |
| Skin.melanoma="^C43",                                                                |
| Breast.cancer="^C50",                                                                |
| Small.intestine="^C17",                                                              |
| Brain.nervs="^C7[0–2] ^C75[1–3] ^D3[2–3] ^D35[2–4] ^D4[2–3] ^D44[3–5]",              |
| Oesophagus="^C15",                                                                   |
| Uterus.cancer="^C54",                                                                |
| Ovary.cancer="^C56 ^57[0–4]",                                                        |
| Cervix.cancer="^C53",                                                                |
| Lip.cancer="^C00[0–2] ^C00[5–9]",                                                    |
| Oropharynx.cancer="^C01 ^C05[1–9] ^C09 ^C100 ^C10[2–9]",                             |
| Oral.cavity="^C00[3–4] ^C0[2–4] ^C050 ^C06",                                         |
| Pharynx="^C0[7–8]",                                                                  |
| Larynx="^C32 ^C101",                                                                 |
| Hypopharynx="^C1[2–3]",                                                              |
| Soft.tissue="^C49 ^C461",                                                            |
| Thyroid.cancer="^C73",                                                               |
| Testis.cancer="^C62",                                                                |
| Uterus.unspec="^C55 ^C58",                                                           |
| Other.gynorg.w="^C5[1–2] ^C57[7–9]",                                                 |
| Other.genital.org.m="^C60 ^C63",                                                     |
| Pleura="^C384 ^C450 ^C45.9",                                                         |
| Bone="^C4[0–1]",                                                                     |
| Nasal="^C3[0–1]",                                                                    |
| Other.spec="^C37 ^C38[0–3] ^C388 ^C45[1–7] ^C46[2–9] ^C4[7–8] ^C74 ^C750 ^C75[4–9]", |
| Unknown.unspec="^C26 ^C39 ^C7[6–9] ^C80 ^C97"                                        |

**Table E 3. Standardized incidence ratio of new cancer in men and women according to**

**severity of acute disease.** The cohort was divided in three categories of equal size based on admission SAPS III scores. SAPS III values were missing in 21 %.

|              |                                       |                                    |      |           |
|--------------|---------------------------------------|------------------------------------|------|-----------|
| <b>Men</b>   | <b>SAPS available, N data missing</b> | <b>8292 (78.5)<br/>2264 (21.4)</b> |      |           |
|              | Median (IQR)                          | 62 (54–71)                         |      |           |
|              | Mean (SD)                             | 62.77 (12.57)                      |      |           |
|              | SAPS                                  | N new cancer                       | SIR  | 95 % CI   |
|              | <57                                   | 192                                | 1.49 | 1.28–1.70 |
|              | 57-<67                                | 198                                | 1.13 | 0.98–1.29 |
|              | ≥67                                   | 250                                | 1.25 | 1.10–1.41 |
| <b>Women</b> | <b>SAPS available, N data missing</b> | <b>6323 (79.1)<br/>1671 (20.9)</b> |      |           |
|              | Median (IQR)                          | 60 (52–69)                         |      |           |
|              | Mean (SD)                             | 61.01 (12.62)                      |      |           |
|              | SAPS                                  | N new cancer                       | SIR  | 95 % CI   |
|              | <55                                   | 115                                | 2.03 | 1.69–2.43 |
|              | 55-<66                                | 168                                | 1.71 | 1.47–1.99 |
|              | ≥66                                   | 170                                | 1.62 | 1.39–1.88 |

SAPS III= Simplified Acute Physiology Score III, IQR= Inter-Quartile Range, SD= Standard deviation, 95 % CI= 95 % confidence interval

**TABLE E 4. Site-specific a) standardized incidence ratios (SIR) and b) crude and adjusted incidence rates (IR) of cancer per 100 000 person years for men. SIR and IR are presented with lower (lCI95) and upper (uCI95) limits of 95% confidence intervals. Cancers with >15 cases are shown.**

a)

| Cancer, site                    | N observed | N expected | SIR  | lCI95 | uCI95 |
|---------------------------------|------------|------------|------|-------|-------|
| Skin nonmelanoma                | 204        | 77.18      | 2.64 | 2.30  | 3.03  |
| Prostate                        | 176        | 257.64     | 0.68 | 0.59  | 0.79  |
| Colorectal                      | 115        | 87.50      | 1.31 | 1.09  | 1.58  |
| Malignant hematopoietic         | 95         | 73.09      | 1.30 | 1.06  | 1.59  |
| Lung                            | 81         | 53.23      | 1.52 | 1.22  | 1.89  |
| Skin melanoma                   | 69         | 39.85      | 1.73 | 1.37  | 2.19  |
| Urinary bladder                 | 54         | 59.70      | 0.90 | 0.69  | 1.18  |
| Liver                           | 32         | 11.75      | 2.72 | 1.93  | 3.85  |
| Stomach                         | 28         | 13.30      | 2.10 | 1.45  | 3.05  |
| Non-Hodgkin lymphoma            | 28         | 23.02      | 1.22 | 0.84  | 1.76  |
| Pancreas                        | 24         | 16.97      | 1.41 | 0.95  | 2.11  |
| Kidney                          | 23         | 17.21      | 1.34 | 0.89  | 2.01  |
| Brain CNS including endocrine   | 23         | 11.37      | 2.02 | 1.34  | 3.05  |
| Lip oral cavity pharynx         | 22         | 14.90      | 1.48 | 0.97  | 2.24  |
| Other illdefined                | 20         | 10.60      | 1.89 | 1.22  | 2.93  |
| Oesophagus                      | 19         | 9.19       | 2.07 | 1.32  | 3.24  |
| Multiple myelomas               | 18         | 10.80      | 1.67 | 1.05  | 2.65  |
| Gallbladder                     | 11         | 4.93       | 2.23 | 1.23  | 4.03  |
| Penis other                     | 10         | 3.04       | 3.28 | 1.77  | 6.10  |
| Chronic lymphatic leukemia      | 8          | 9.48       | 0.84 | 0.42  | 1.69  |
| Small intestine                 | 6          | 3.67       | 1.63 | 0.73  | 3.63  |
| Larynx                          | 6          | 3.63       | 1.65 | 0.74  | 3.68  |
| Other specified                 | 6          | 2.48       | 2.42 | 1.09  | 5.39  |
| Thyroid                         | 5          | 2.52       | 1.98 | 0.83  | 4.77  |
| Soft tissue                     | 5          | 3.72       | 1.34 | 0.56  | 3.23  |
| Acute myeloid leukemia          | 5          | 3.50       | 1.43 | 0.59  | 3.43  |
| Chronic myeloid leukemia        | 4          | 2.06       | 1.94 | 0.73  | 5.17  |
| Pleura                          | 3          | 2.68       | 1.12 | 0.36  | 3.47  |
| Nasal cavity middle ear sinuses | 2          | 0.95       | 2.10 | 0.53  | 8.42  |
| Testis                          | 1          | 1.76       | 0.57 | 0.08  | 4.03  |
| Eye                             | 1          | 1.50       | 0.67 | 0.09  | 4.75  |
| Acute lymphatic leukemia        | 1          | 0.34       | 2.95 | 0.42  | 20.92 |
| Bone                            | 0          | 0.66       | 0.00 | 0.00  |       |

CNS, central nervous system

b)

| Cancer, site                    | Crude rate | Adjusted rate | ICI95  | uCI95  |
|---------------------------------|------------|---------------|--------|--------|
| Skin nonmelanoma                | 471.32     | 330.77        | 288.35 | 379.42 |
| Prostate                        | 405.99     | 256.22        | 221.03 | 297.01 |
| Colorectal                      | 263.90     | 178.99        | 149.10 | 214.89 |
| Malignant hematopoietic         | 217.74     | 133.84        | 109.46 | 163.65 |
| Lung                            | 185.19     | 118.25        | 95.11  | 147.03 |
| Skin melanoma                   | 158.14     | 102.71        | 81.12  | 130.04 |
| Urinary bladder                 | 123.62     | 81.74         | 62.60  | 106.73 |
| Liver                           | 73.13      | 42.38         | 29.97  | 59.93  |
| Non-Hodgkin lymphoma            | 63.99      | 43.41         | 29.97  | 62.87  |
| Stomach                         | 63.97      | 47.57         | 32.84  | 68.89  |
| Pancreas                        | 54.80      | 31.04         | 20.80  | 46.31  |
| Brain CNS including endocrine   | 52.59      | 37.24         | 24.75  | 56.04  |
| Kidney                          | 52.56      | 31.97         | 21.24  | 48.10  |
| Lip oral cavity pharynx         | 50.26      | 32.82         | 21.61  | 49.85  |
| Other illdefined                | 45.68      | 37.69         | 24.32  | 58.42  |
| Oesophagus                      | 43.40      | 27.29         | 17.40  | 42.78  |
| Multiple myelomas               | 41.12      | 26.29         | 16.57  | 41.73  |
| Gallbladder                     | 25.11      | 15.23         | 8.43   | 27.50  |
| Penis other                     | 22.84      | 14.59         | 7.85   | 27.12  |
| Chronic lymphatic leukemia      | 18.27      | 12.02         | 6.01   | 24.04  |
| Small intestine                 | 13.70      | 9.34          | 4.20   | 20.79  |
| Larynx                          | 13.70      | 9.12          | 4.10   | 20.30  |
| Other specified                 | 13.70      | 9.77          | 4.39   | 21.75  |
| Thyroid                         | 11.42      | 8.21          | 3.42   | 19.72  |
| Soft tissue                     | 11.42      | 8.41          | 3.50   | 20.20  |
| Acute myeloid leukemia          | 11.41      | 8.66          | 3.60   | 20.80  |
| Chronic myeloid leukemia        | 9.13       | 6.65          | 2.50   | 17.73  |
| Pleura                          | 6.85       | 4.43          | 1.43   | 13.73  |
| Nasal cavity middle ear sinuses | 4.57       | 3.28          | 0.82   | 13.12  |
| Testis                          | 2.28       | 4.30          | 0.61   | 30.55  |
| Eye                             | 2.28       | 1.56          | 0.22   | 11.07  |
| Acute lymphatic leukemia        | 2.28       | 2.23          | 0.31   | 15.81  |
| Bone                            | 0.00       | 0.00          | 0.00   | 0.00   |

CNS, central nervous system

**TABLE E 5. Site-specific a) standardized incidence ratios (SIR) and b) crude and adjusted incidence rates (IR) of cancer per 100 000 person years for women. SIR and IR are presented with lower (lCI95) and upper (uCI95) limits of 95% confidence intervals. Cancers with >15 cases are shown.**

a)

| Cancer, site                    | N observed | N expected | SIR  | lCI95 | uCI95 |
|---------------------------------|------------|------------|------|-------|-------|
| Skin nonmelanoma                | 119        | 34.19      | 3.48 | 2.91  | 4.17  |
| Breast                          | 91         | 93.67      | 0.97 | 0.79  | 1.19  |
| Colorectal                      | 67         | 47.88      | 1.40 | 1.10  | 1.78  |
| Lung                            | 63         | 34.59      | 1.82 | 1.42  | 2.33  |
| Malignant hematopoietic         | 59         | 32.19      | 1.83 | 1.42  | 2.37  |
| Skin melanoma                   | 38         | 21.80      | 1.74 | 1.27  | 2.40  |
| Cervix uteri                    | 32         | 4.78       | 6.69 | 4.73  | 9.47  |
| Non-Hodgkin lymphoma            | 28         | 15.18      | 1.84 | 1.27  | 2.67  |
| Other illdefined                | 26         | 10.18      | 2.56 | 1.74  | 3.75  |
| Corpus uteri                    | 23         | 21.65      | 1.06 | 0.71  | 1.60  |
| Pancreas                        | 19         | 10.97      | 1.73 | 1.11  | 2.72  |
| Multiple myelomas               | 18         | 6.68       | 2.70 | 1.70  | 4.28  |
| Lip oral cavity pharynx         | 17         | 6.44       | 2.64 | 1.64  | 4.25  |
| Bladder urinary                 | 16         | 12.66      | 1.26 | 0.77  | 2.06  |
| Gallbladder                     | 15         | 4.31       | 3.48 | 2.10  | 5.78  |
| Brain CNS including endocrine   | 15         | 8.97       | 1.67 | 1.01  | 2.77  |
| Other specified                 | 14         | 3.46       | 4.05 | 2.40  | 6.83  |
| Vulva                           | 12         | 2.98       | 4.03 | 2.29  | 7.09  |
| Oesophagus                      | 11         | 2.13       | 5.17 | 2.86  | 9.34  |
| Stomach                         | 11         | 5.00       | 2.20 | 1.22  | 3.97  |
| Kidney                          | 9          | 6.58       | 1.37 | 0.71  | 2.63  |
| Thyroid                         | 9          | 3.91       | 2.30 | 1.20  | 4.42  |
| Liver                           | 8          | 3.67       | 2.18 | 1.09  | 4.36  |
| Chronic lymphatic leukemia      | 8          | 5.09       | 1.57 | 0.79  | 3.14  |
| Ovary tubes                     | 6          | 9.88       | 0.61 | 0.27  | 1.35  |
| Acute myeloid leukemia          | 5          | 2.85       | 1.75 | 0.73  | 4.21  |
| Small intestine                 | 4          | 1.93       | 2.07 | 0.78  | 5.53  |
| Chronic myeloid leukemia        | 4          | 1.26       | 3.18 | 1.19  | 8.46  |
| Soft tissue                     | 2          | 1.66       | 1.21 | 0.30  | 4.82  |
| Vagina                          | 1          | 0.49       | 2.04 | 0.29  | 14.51 |
| Uterus other                    | 1          | 2.02       | 0.49 | 0.07  | 3.51  |
| Larynx                          | 1          | 0.46       | 2.19 | 0.31  | 15.57 |
| Nasal cavity middle ear sinuses | 1          | 0.45       | 2.22 | 0.31  | 15.77 |
| Eye                             | 1          | 0.84       | 1.20 | 0.17  | 8.49  |
| Acute lymphatic leukemia        | 1          | 0.33       | 3.02 | 0.43  | 21.46 |
| Pleura                          | 0          | 0.31       | 0.00 | 0.00  |       |
| Bone                            | 0          | 0.39       | 0.00 | 0.00  |       |

CNS, central nervous system

b)

| Cancer, site                    | Crude rate | Adjusted rate | ICI95  | uCI95  |
|---------------------------------|------------|---------------|--------|--------|
| Skin nonmelanoma                | 341.39     | 255.03        | 213.09 | 305.22 |
| Breast                          | 260.89     | 198.60        | 161.72 | 243.90 |
| Colorectal                      | 191.24     | 140.78        | 110.81 | 178.87 |
| Lung                            | 179.49     | 116.22        | 90.79  | 148.77 |
| Malignant hematopoietic         | 168.32     | 122.33        | 94.78  | 157.89 |
| Skin melanoma                   | 108.32     | 81.18         | 59.07  | 111.57 |
| Cervix uteri                    | 91.20      | 89.73         | 63.45  | 126.88 |
| Other illdefined                | 73.94      | 62.79         | 42.75  | 92.22  |
| Corpus uteri                    | 65.53      | 47.58         | 31.62  | 71.60  |
| Non-Hodgkin lymphoma            | 63.99      | 43.53         | 30.06  | 63.05  |
| Pancreas                        | 54.05      | 34.14         | 21.77  | 53.52  |
| Lip oral cavity pharynx         | 48.40      | 34.81         | 21.64  | 56.00  |
| Bladder urinary                 | 45.52      | 32.00         | 19.60  | 52.23  |
| Brain CNS including endocrine   | 42.71      | 33.17         | 20.00  | 55.02  |
| Gallbladder                     | 42.67      | 29.34         | 17.69  | 48.67  |
| Multiple myelomas               | 41.12      | 27.46         | 17.30  | 43.59  |
| Other specified                 | 39.86      | 27.52         | 16.30  | 46.47  |
| Vulva                           | 34.15      | 25.80         | 14.65  | 45.43  |
| Stomach                         | 31.29      | 24.98         | 13.83  | 45.10  |
| Oesophagus                      | 31.28      | 21.89         | 12.12  | 39.52  |
| Thyroid                         | 25.61      | 21.87         | 11.38  | 42.04  |
| Kidney                          | 25.60      | 17.88         | 9.30   | 34.36  |
| Liver                           | 22.76      | 15.18         | 7.59   | 30.36  |
| Chronic lymph leukemia          | 18.27      | 11.58         | 5.79   | 23.16  |
| Ovary tubes                     | 17.07      | 13.13         | 5.90   | 29.22  |
| Acute myeloid leukemia          | 11.41      | 8.43          | 3.51   | 20.25  |
| Small intestine                 | 11.38      | 8.29          | 3.11   | 22.08  |
| Chronic myeloid leukemia        | 9.13       | 6.47          | 2.43   | 17.25  |
| Soft tissue                     | 5.69       | 4.76          | 1.19   | 19.05  |
| Vagina                          | 2.84       | 2.28          | 0.32   | 16.18  |
| Uterus other                    | 2.84       | 1.94          | 0.27   | 13.76  |
| Larynx                          | 2.84       | 2.12          | 0.30   | 15.07  |
| Nasal cavity middle ear sinuses | 2.84       | 2.17          | 0.31   | 15.37  |
| Eye                             | 2.84       | 2.11          | 0.30   | 15.00  |
| Acute lymph leukemia            | 2.28       | 1.78          | 0.25   | 12.66  |
| Pleura                          | 0.00       | 0.00          | 0.00   | 0.00   |
| Bone                            | 0.00       | 0.00          | 0.00   | 0.00   |

CNS, central nervous system



**TABLE E 6. Site-specific standardized incidence ratios (SIR) of cancer by length of follow up for men. SIRs are presented with lower (lCI95) and upper (uCI95) limits of 95% confidence intervals. Cancers with >15 cases are shown.**

| Cancer. site            | Follow-up time, years | N observed | N expected | SIR  | lCI95 | uCI95 |
|-------------------------|-----------------------|------------|------------|------|-------|-------|
| Urinary bladder         | <1                    | 17         | 8.14       | 2.09 | 1.30  | 3.36  |
| Urinary bladder         | 1-2                   | 20         | 22.51      | 0.89 | 0.57  | 1.38  |
| Urinary bladder         | 3-4                   | 7          | 13.89      | 0.50 | 0.24  | 1.06  |
| Urinary bladder         | >=5                   | 10         | 15.16      | 0.66 | 0.35  | 1.23  |
| Brain CNS incl endoc    | <1                    | 8          | 1.63       | 4.92 | 2.46  | 9.84  |
| Brain CNS incl endoc    | 1-2                   | 5          | 4.30       | 1.16 | 0.48  | 2.79  |
| Brain CNS incl endoc    | 3-4                   | 6          | 2.66       | 2.25 | 1.01  | 5.02  |
| Brain CNS incl endoc    | >=5                   | 4          | 2.78       | 1.44 | 0.54  | 3.84  |
| Colorectal              | <1                    | 19         | 12.28      | 1.55 | 0.99  | 2.43  |
| Colorectal              | 1-2                   | 36         | 33.23      | 1.08 | 0.78  | 1.50  |
| Colorectal              | 3-4                   | 32         | 20.24      | 1.58 | 1.12  | 2.24  |
| Colorectal              | >=5                   | 28         | 21.75      | 1.29 | 0.89  | 1.86  |
| Kidney                  | <1                    | 5          | 2.38       | 2.10 | 0.87  | 5.05  |
| Kidney                  | 1-2                   | 7          | 6.45       | 1.09 | 0.52  | 2.28  |
| Kidney                  | 3-4                   | 1          | 4.01       | 0.25 | 0.04  | 1.77  |
| Kidney                  | >=5                   | 10         | 4.37       | 2.29 | 1.23  | 4.25  |
| Lip oral cavity pharynx | <1                    | 4          | 2.06       | 1.94 | 0.73  | 5.18  |
| Lip oral cavity pharynx | 1-2                   | 13         | 5.60       | 2.32 | 1.35  | 4.00  |
| Lip oral cavity pharynx | 3-4                   | 3          | 3.49       | 0.86 | 0.28  | 2.67  |
| Lip oral cavity pharynx | >=5                   | 2          | 3.76       | 0.53 | 0.13  | 2.13  |
| Liver                   | <1                    | 9          | 1.54       | 5.85 | 3.04  | 11.23 |
| Liver                   | 1-2                   | 9          | 4.35       | 2.07 | 1.08  | 3.98  |
| Liver                   | 3-4                   | 5          | 2.77       | 1.81 | 0.75  | 4.34  |
| Liver                   | >=5                   | 9          | 3.09       | 2.91 | 1.51  | 5.60  |
| Lung                    | <1                    | 18         | 7.59       | 2.37 | 1.49  | 3.76  |
| Lung                    | 1-2                   | 37         | 20.31      | 1.82 | 1.32  | 2.51  |
| Lung                    | 3-4                   | 12         | 12.35      | 0.97 | 0.55  | 1.71  |
| Lung                    | >=5                   | 14         | 12.97      | 1.08 | 0.64  | 1.82  |
| Malignant hematopoietic | <1                    | 23         | 10.26      | 2.24 | 1.49  | 3.37  |
| Malignant hematopoietic | 1-2                   | 30         | 27.57      | 1.09 | 0.76  | 1.56  |
| Malignant hematopoietic | 3-4                   | 19         | 17.06      | 1.11 | 0.71  | 1.75  |
| Malignant hematopoietic | >=5                   | 23         | 18.20      | 1.26 | 0.84  | 1.90  |
| Multiple myelomas       | <1                    | 5          | 1.47       | 3.40 | 1.41  | 8.16  |
| Multiple myelomas       | 1-2                   | 6          | 4.06       | 1.48 | 0.66  | 3.29  |
| Multiple myelomas       | 3-4                   | 4          | 2.52       | 1.59 | 0.60  | 4.24  |
| Multiple myelomas       | >=5                   | 3          | 2.75       | 1.09 | 0.35  | 3.38  |
| Non-Hodgkin lymphoma    | <1                    | 6          | 3.22       | 1.86 | 0.84  | 4.14  |
| Non-Hodgkin lymphoma    | 1-2                   | 12         | 8.70       | 1.38 | 0.78  | 2.43  |
| Non-Hodgkin lymphoma    | 3-4                   | 4          | 5.35       | 0.75 | 0.28  | 1.99  |
| Non-Hodgkin lymphoma    | >=5                   | 6          | 5.74       | 1.05 | 0.47  | 2.33  |
| Oesophagus              | <1                    | 3          | 1.26       | 2.39 | 0.77  | 7.41  |
| Oesophagus              | 1-2                   | 7          | 3.47       | 2.02 | 0.96  | 4.24  |
| Oesophagus              | 3-4                   | 3          | 2.15       | 1.39 | 0.45  | 4.32  |
| Oesophagus              | >=5                   | 6          | 2.32       | 2.59 | 1.16  | 5.77  |
| Other illdefined        | <1                    | 8          | 1.68       | 4.75 | 2.37  | 9.49  |
| Other illdefined        | 1-2                   | 7          | 4.23       | 1.66 | 0.79  | 3.47  |
| Other illdefined        | 3-4                   | 3          | 2.41       | 1.25 | 0.40  | 3.86  |
| Other illdefined        | >=5                   | 2          | 2.28       | 0.88 | 0.22  | 3.51  |
| Pancreas                | <1                    | 4          | 2.27       | 1.77 | 0.66  | 4.70  |
| Pancreas                | 1-2                   | 11         | 6.30       | 1.75 | 0.97  | 3.15  |
| Pancreas                | 3-4                   | 6          | 3.99       | 1.50 | 0.68  | 3.35  |

| Cancer. site     | Follow-up time, years | N observed | N expected | SIR  | ICI95 | uCI95 |
|------------------|-----------------------|------------|------------|------|-------|-------|
| Pancreas         | >=5                   | 3          | 4.41       | 0.68 | 0.22  | 2.11  |
| Prostate         | <1                    | 38         | 36.83      | 1.03 | 0.75  | 1.42  |
| Prostate         | 1-2                   | 54         | 98.61      | 0.55 | 0.42  | 0.71  |
| Prostate         | 3-4                   | 43         | 59.94      | 0.72 | 0.53  | 0.97  |
| Prostate         | >=5                   | 41         | 62.26      | 0.66 | 0.48  | 0.89  |
| Skin melanoma    | <1                    | 12         | 5.27       | 2.28 | 1.29  | 4.01  |
| Skin melanoma    | 1-2                   | 25         | 14.82      | 1.69 | 1.14  | 2.50  |
| Skin melanoma    | 3-4                   | 15         | 9.36       | 1.60 | 0.97  | 2.66  |
| Skin melanoma    | >=5                   | 17         | 10.41      | 1.63 | 1.02  | 2.63  |
| Skin nonmelanoma | <1                    | 51         | 10.07      | 5.07 | 3.85  | 6.67  |
| Skin nonmelanoma | 1-2                   | 63         | 28.89      | 2.18 | 1.70  | 2.79  |
| Skin nonmelanoma | 3-4                   | 46         | 18.07      | 2.55 | 1.91  | 3.40  |
| Skin nonmelanoma | >=5                   | 44         | 20.16      | 2.18 | 1.62  | 2.93  |
| Stomach          | <1                    | 6          | 1.93       | 3.12 | 1.40  | 6.94  |
| Stomach          | 1-2                   | 8          | 5.09       | 1.57 | 0.79  | 3.14  |
| Stomach          | 3-4                   | 10         | 3.07       | 3.26 | 1.75  | 6.05  |
| Stomach          | >=5                   | 4          | 3.21       | 1.24 | 0.47  | 3.32  |

CNS, central nervous system

**TABLE E 7. Site-specific standardized incidence ratios (SIR) of cancer by length of follow up for women. SIRs are presented with lower (lCI95) and upper (uCI95) limits of 95% confidence intervals. Cancers with >15 cases are shown.**

| Cancer.site             | Follow-up time, years | N observed | N expected | SIR   | lCI95 | uCI95 |
|-------------------------|-----------------------|------------|------------|-------|-------|-------|
| Urinary bladder         | <1                    | 2          | 1.17       | 1.70  | 0.43  | 6.82  |
| Urinary bladder         | 1-2                   | 6          | 4.47       | 1.34  | 0.60  | 2.99  |
| Urinary bladder         | 3-4                   | 4          | 3.16       | 1.26  | 0.47  | 3.37  |
| Urinary bladder         | >=5                   | 4          | 1.45       | 2.75  | 1.03  | 7.34  |
| Breast                  | <1                    | 14         | 9.38       | 1.49  | 0.88  | 2.52  |
| Breast                  | 1-2                   | 32         | 33.66      | 0.95  | 0.67  | 1.34  |
| Breast                  | 3-4                   | 26         | 23.33      | 1.11  | 0.76  | 1.64  |
| Breast                  | >=5                   | 19         | 27.30      | 0.70  | 0.44  | 1.09  |
| Cervix uteri            | <1                    | 6          | 0.46       | 13.17 | 5.92  | 29.31 |
| Cervix uteri            | 1-2                   | 11         | 1.66       | 6.62  | 3.67  | 11.95 |
| Cervix uteri            | 3-4                   | 6          | 1.19       | 5.06  | 2.27  | 11.26 |
| Cervix uteri            | >=5                   | 9          | 1.48       | 6.09  | 3.17  | 11.71 |
| Colorectal              | <1                    | 12         | 4.63       | 2.59  | 1.47  | 4.56  |
| Colorectal              | 1-2                   | 24         | 17.06      | 1.41  | 0.94  | 2.10  |
| Colorectal              | 3-4                   | 17         | 11.90      | 1.43  | 0.89  | 2.30  |
| Colorectal              | >=5                   | 14         | 14.28      | 0.98  | 0.58  | 1.65  |
| Corpus uteri            | <1                    | 8          | 2.22       | 3.60  | 1.80  | 7.21  |
| Corpus uteri            | 1-2                   | 5          | 7.82       | 0.64  | 0.27  | 1.54  |
| Corpus uteri            | 3-4                   | 6          | 5.34       | 1.12  | 0.50  | 2.50  |
| Corpus uteri            | >=5                   | 4          | 6.26       | 0.64  | 0.24  | 1.70  |
| Lip oral cavity pharynx | <1                    | 5          | 0.60       | 8.37  | 3.48  | 20.11 |
| Lip oral cavity pharynx | 1-2                   | 6          | 2.26       | 2.66  | 1.19  | 5.92  |
| Lip oral cavity pharynx | 3-4                   | 4          | 1.61       | 2.49  | 0.93  | 6.63  |
| Lip oral cavity pharynx | >=5                   | 2          | 3.85       | 0.52  | 0.13  | 2.08  |
| Lung                    | <1                    | 14         | 3.35       | 4.18  | 2.48  | 7.06  |
| Lung                    | 1-2                   | 26         | 12.35      | 2.11  | 1.43  | 3.09  |
| Lung                    | 3-4                   | 9          | 8.58       | 1.05  | 0.55  | 2.02  |
| Lung                    | >=5                   | 14         | 10.32      | 1.36  | 0.80  | 2.29  |
| Malignant hematopoietic | <1                    | 13         | 3.09       | 4.20  | 2.44  | 7.24  |
| Malignant hematopoietic | 1-2                   | 21         | 11.43      | 1.84  | 1.20  | 2.82  |
| Malignant hematopoietic | 3-4                   | 12         | 8.01       | 1.50  | 0.85  | 2.64  |
| Malignant hematopoietic | >=5                   | 13         | 9.66       | 1.35  | 0.78  | 2.32  |
| Multiple myelomas       | <1                    | 5          | 0.68       | 7.40  | 3.08  | 17.77 |
| Multiple myelomas       | 1-2                   | 6          | 2.46       | 2.44  | 1.10  | 5.43  |
| Multiple myelomas       | 3-4                   | 4          | 1.64       | 2.44  | 0.92  | 6.50  |
| Multiple myelomas       | >=5                   | 3          | 2.54       | 1.18  | 0.38  | 3.66  |
| Multiple myelomas 0     | >=5                   | 3          | 1.90       | 1.58  | 0.51  | 4.89  |
| Non-Hodgkin lymphoma    | <1                    | 6          | 1.55       | 3.87  | 1.74  | 8.62  |
| Non-Hodgkin lymphoma    | 1-2                   | 12         | 5.52       | 2.17  | 1.23  | 3.83  |
| Non-Hodgkin lymphoma    | 3-4                   | 4          | 3.73       | 1.07  | 0.40  | 2.86  |
| Non-Hodgkin lymphoma    | >=5                   | 6          | 4.38       | 1.37  | 0.62  | 3.05  |
| Other illdefined        | <1                    | 7          | 1.16       | 6.02  | 2.87  | 12.62 |
| Other illdefined        | 1-2                   | 9          | 3.81       | 2.36  | 1.23  | 4.54  |
| Other illdefined        | 3-4                   | 8          | 2.50       | 3.20  | 1.60  | 6.40  |
| Other illdefined        | >=5                   | 2          | 2.70       | 0.74  | 0.19  | 2.96  |
| Pancreas                | <1                    | 2          | 1.01       | 1.99  | 0.50  | 7.94  |
| Pancreas                | 1-2                   | 10         | 3.86       | 2.59  | 1.39  | 4.82  |
| Pancreas                | 3-4                   | 6          | 2.73       | 2.20  | 0.99  | 4.89  |
| Pancreas                | >=5                   | 1          | 3.37       | 0.30  | 0.04  | 2.11  |

| Cancer. site     | Follow-up time, years | N observed | N expected | SIR  | ICI95 | uCI95 |
|------------------|-----------------------|------------|------------|------|-------|-------|
| Skin melanoma    | <1                    | 7          | 1.94       | 3.61 | 1.72  | 7.58  |
| Skin melanoma    | 1-2                   | 11         | 7.49       | 1.47 | 0.81  | 2.65  |
| Skin melanoma    | 3-4                   | 8          | 5.48       | 1.46 | 0.73  | 2.92  |
| Skin melanoma    | >=5                   | 12         | 6.89       | 1.74 | 0.99  | 3.07  |
| Skin nonmelanoma | <1                    | 27         | 2.94       | 9.20 | 6.31  | 13.41 |
| Skin nonmelanoma | 1-2                   | 44         | 11.78      | 3.74 | 2.78  | 5.02  |
| Skin nonmelanoma | 3-4                   | 26         | 8.75       | 2.97 | 2.02  | 4.37  |
| Skin nonmelanoma | >=5                   | 22         | 10.73      | 2.05 | 1.35  | 3.11  |

CNS, central nervous system
